# Supplementary material for: MoS2 nanosheet incorporated α-Fe2O3/ZnO nanocomposite with enhanced photocatalytic dye degradation and hydrogen production ability
Source: Royal Society of Chemistry journal article supplement (doi:10.1039/c9ra07526g), 2019-01-01
Supplement: c9ra07526g1.pdf [file c9ra07526g1.pdf]

## Electronic Supplementary Information

### ***MoS<sub>2</sub> nanosheets incorporated $\alpha$ -Fe<sub>2</sub>O<sub>3</sub>/ZnO nanocomposite with enhanced photocatalytic dye degradation and hydrogen production ability***

Angkita Mistry Tama<sup>a†</sup>, Subrata Das<sup>a†</sup>, Sagar Dutta<sup>a</sup>, M D I Bhuyan<sup>a</sup>, M. N. Islam<sup>b</sup> and M. A. Basith<sup>a</sup>

<sup>a</sup> Nanotechnology Research Laboratory, Department of Physics, Bangladesh University of Engineering and Technology, Dhaka-1000, Bangladesh.

<sup>b</sup> Department of Chemistry, Bangladesh University of Engineering and Technology, Dhaka-1000, Bangladesh.

†These authors contributed equally.

**Table S1** Atomic coordinates, constituent crystallographic phases (in wt%) of synthesized nanomaterials and reliability (R) factors obtained from Rietveld refined powder spectra. Numbers in the parentheses indicate errors in the last significant digit.

| Sample                                                 | Atomic Coordinates                                                                                                                                            | Crystallographic Phase (in wt%)   | R Factor                                                                |
|--------------------------------------------------------|---------------------------------------------------------------------------------------------------------------------------------------------------------------|-----------------------------------|-------------------------------------------------------------------------|
| $\alpha$ -Fe <sub>2</sub> O <sub>3</sub>               | Fe (0,0, 0.3557)<br>O (0.3176,0,0.25)                                                                                                                         | Trigonal (100%)                   | $R_{wp} = 2.83$<br>$R_p = 2.25$<br>$R_{Exp} = 2.90$<br>$\chi^2 = 0.953$ |
| $\alpha$ -Fe <sub>2</sub> O <sub>3</sub> /ZnO          | Fe (0,0, 0.3556)<br>O (0.3052,0,0.25)<br>Zn (0.33333,0.66667,0)<br>O (0.33333,0.66667,<br>0.3919)                                                             | Trigonal (80%)<br>Hexagonal (20%) | $R_{wp} = 3.01$<br>$R_p = 2.41$<br>$R_{Exp} = 2.94$<br>$\chi^2 = 1.00$  |
| NMS inc. $\alpha$ -Fe <sub>2</sub> O <sub>3</sub> /ZnO | Fe (0,0, 0.3563)<br>O (0.3067,0,0.25)<br>Zn (0.33333,0.66667,0)<br>O (0.33333,0.66667,<br>0.3663)<br>Mo (0.33333,0.66667,0)<br>S (0.33333,0.66667,<br>0.6243) | Trigonal (17%)<br>Hexagonal (83%) | $R_{wp} = 4.34$<br>$R_p = 3.27$<br>$R_{Exp} = 3.27$<br>$\chi^2 = 1.77$  |
| UMS inc. $\alpha$ -Fe <sub>2</sub> O <sub>3</sub> /ZnO | Fe (0,0, 0.3547)<br>O (0.3121,0,0.25)<br>Zn (0.33333,0.66667,0)<br>O (0.33333,0.66667,<br>0.3508)<br>Mo (0.33333,0.66667,0)<br>S (0.33333,0.66667,<br>0.6243) | Trigonal (24%)<br>Hexagonal (76%) | $R_{wp} = 2.73$<br>$R_p = 2.19$<br>$R_{Exp} = 2.67$<br>$\chi^2 = 1.05$  |

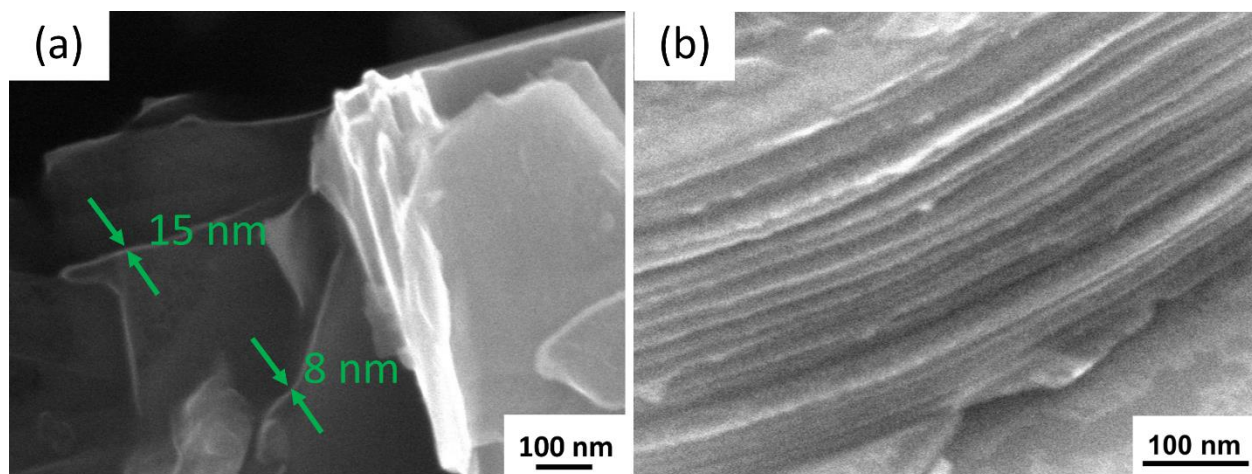

**Fig. S1** FESEM images of ultrasonicated few-layer MoS<sub>2</sub> nanosheets with two different magnifications. The layer thickness of two nanosheets is marked in (a) and an overall view of successfully delaminated few-layer nanosheets of MoS<sub>2</sub> is demonstrated in (b).

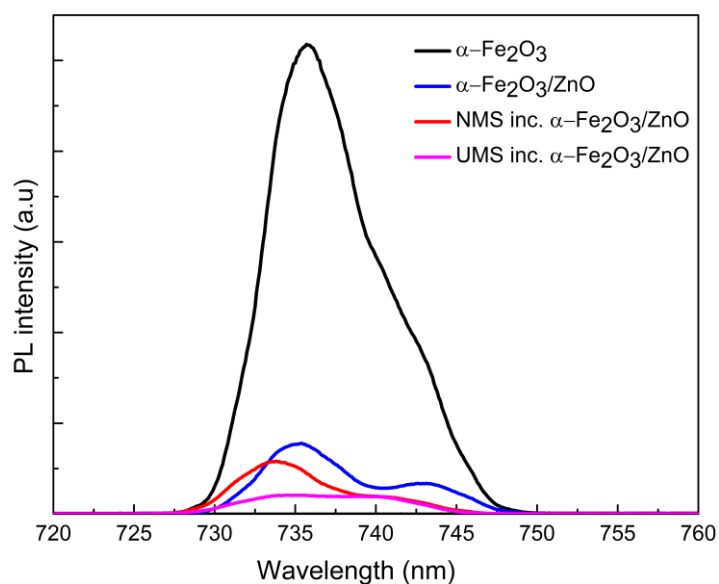

**Fig. S2** (a) Steady-state photoluminescence intensity spectra of synthesized  $\alpha$ -Fe<sub>2</sub>O<sub>3</sub> nanoparticles,  $\alpha$ -Fe<sub>2</sub>O<sub>3</sub>/ZnO, non-ultrasonicated MoS<sub>2</sub> incorporated  $\alpha$ -Fe<sub>2</sub>O<sub>3</sub>/ZnO and ultrasonicated MoS<sub>2</sub> incorporated  $\alpha$ -Fe<sub>2</sub>O<sub>3</sub>/ZnO nanocomposites.

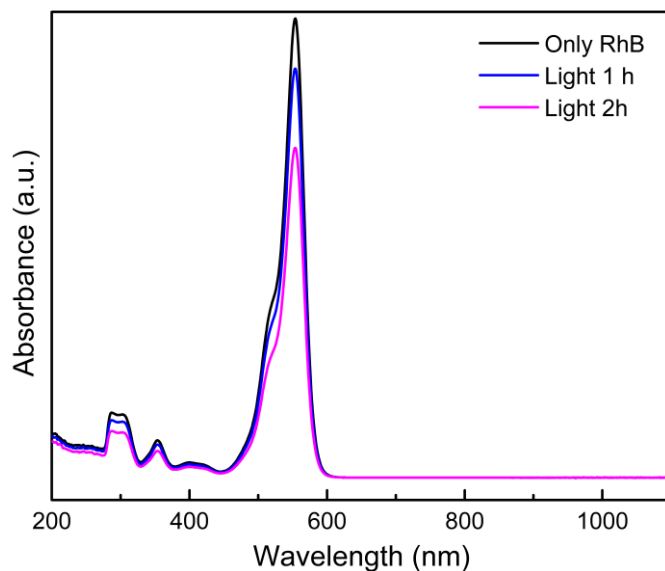

**Fig. S3** Absorption spectra of RhB dye solution before and after being photodegraded by ultrasonicated MoS<sub>2</sub> incorporated  $\alpha$ -Fe<sub>2</sub>O<sub>3</sub>/ZnO under UV-visible light irradiation.

**Table S2** Amount of produced hydrogen gas by as-synthesized ultrasonicated MoS<sub>2</sub> incorporated  $\alpha$ -Fe<sub>2</sub>O<sub>3</sub>/ZnO and other analogous nanocomposites

| Photocatalyst                                          | Light Source           | Amount of produced hydrogen gas after 4 hours of irradiation ( $\mu\text{mol H}_2$ /g catalyst) | Reference    |
|--------------------------------------------------------|------------------------|-------------------------------------------------------------------------------------------------|--------------|
| UMS inc. $\alpha$ -Fe <sub>2</sub> O <sub>3</sub> /ZnO | 500 W Hg-Xe lamp       | ~614                                                                                            | Present work |
| MoS <sub>2</sub> /RGO                                  | 300 W Xe lamp          | ~190                                                                                            | [1]          |
| WO <sub>3</sub> /g-C <sub>3</sub> N <sub>4</sub>       | Artificial solar light | ~250                                                                                            | [2]          |
| TiO <sub>2</sub> /MoSe <sub>2</sub>                    | 300 W Xe lamp          | ~20                                                                                             | [3]          |

### Calculation of Conduction Band Minima (CBM) and Valence Band Maxima (VBM)

The Fermi energy ( $E_F$ ) of a semiconductor material can be calculated theoretically using the empirical formula<sup>4</sup>:

$$E_F = \chi - E_c \quad (1)$$

Here,  $\chi$  is the absolute electronegativity and  $E_c$  is the free electron energy on hydrogen scale (approximately 4.5 eV). For compound semiconductors,  $\chi$  is calculated using the geometric mean of constituent atoms' absolute electronegativity.<sup>5</sup> Usually for semiconductor, Fermi energy denotes the

midlevel of the gap between CBM and VBM. Hence, the CBM and VBM of a semiconductor can be calculated using the following equations:

$$\text{CBM} = E_F - 0.5E_g \quad (2)$$

$$\text{VBM} = E_F + 0.5E_g \quad (3)$$

Here,  $E_g$  denotes the bandgap energy.

The calculated values of  $\chi$ ,  $E_F$ , CBM and VBM for  $\alpha$ -Fe<sub>2</sub>O<sub>3</sub>, ZnO and MoS<sub>2</sub> nanosheets are presented in Table S3. For  $\alpha$ -Fe<sub>2</sub>O<sub>3</sub>, the experimentally obtained bandgap ( $E_g$ ) value is used whereas for ZnO and few-layer MoS<sub>2</sub> nanosheets, we have considered the bandgap values as reported by previous investigations.<sup>6,7</sup>

**Table S3** Obtained values of absolute electronegativity ( $\chi$ ), bandgap energy ( $E_g$ ), Fermi energy ( $E_F$ ), CBM and VBM of  $\alpha$ -Fe<sub>2</sub>O<sub>3</sub>, ZnO and few-layer MoS<sub>2</sub> nanosheets.

| Material                                 | $\chi$ (eV) | $E_g$ (eV) | $E_F$ (eV) | CBM (eV) | VBM (eV) |
|------------------------------------------|-------------|------------|------------|----------|----------|
| $\alpha$ -Fe <sub>2</sub> O <sub>3</sub> | 5.88618     | 1.87       | 1.386      | 0.451    | 2.321    |
| ZnO                                      | 5.79250     | 3.37       | 1.293      | -0.393   | 2.978    |
| MoS <sub>2</sub> Nanosheets              | 5.32372     | 1.25       | 0.824      | 0.199    | 1.449    |

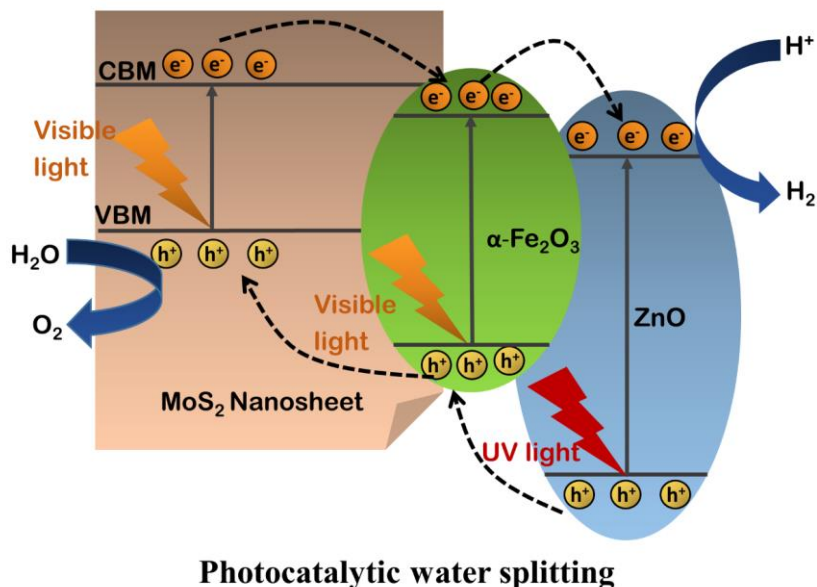

**Fig. S4** Schematic of proposed photocatalytic water splitting mechanism using ultrasonicated MoS<sub>2</sub> incorporated  $\alpha$ -Fe<sub>2</sub>O<sub>3</sub>/ZnO nanocomposite as catalyst under solar light irradiation

## References

1. S. Min and G. Lu, *J. Phys. Chem. C*, 2012, **116**, 25415-25424.
2. H. Katsumata, Y. Tachi, T. Suzuki and S. Kaneco, *RSC Adv.*, 2014, **4**, 21405-21409.
3. L. Wu, S. Shi, Q. Li, X. Zhang and X. Cui, *Int. J. Hydrog. Energy*, 2019, **44**, 720-728.
4. Y. Cui, S. M. Goldup and S. Dunn, *RSC Adv.*, 2015, **5**, 30372-30379.
5. R. G. Pearson, *Inorganic chem.*, 1988, **27**, 734-740.
6. S. Das, A. M. Tama, S. Dutta, M. S. Ali and M. A. Basith, *Mater. Res. Express*, 2019.  
DOI:10.1088/2053-1591/ab57dd
7. V. Srikant and D. Clarke, *J. Appl. Phys.*, 1998, **83**, 5447-5451.
